# Supplementary material
Source: PubMed Central journal article supplement (PMC7095883)
Supplement: 41591_2004_BFnm1077_MOESM1_ESM.pdf [file 41591_2004_BFnm1077_MOESM1_ESM.pdf]

Supplemental Table 1: Pneumococcal bacteremia and respiratory viral isolation in intent-to-treat analysis.

| Virus isolated                        | Overall <sup>e</sup> |         | HIV - infected |         | HIV - uninfected |         |
|---------------------------------------|----------------------|---------|----------------|---------|------------------|---------|
|                                       | Vaccinees            | Placebo | Vaccinees      | Placebo | Vaccinees        | Placebo |
| No virus isolated                     | N <sup>a</sup> =718  | N=834   | N=335          | N=388   | N=365            | N=430   |
| Vaccine serotype <sup>b</sup>         | 4                    | 9       | 2              | 7       | 2                | 2       |
| Vaccine related serotype <sup>c</sup> | 2                    | 6       | 1              | 5       | 1                | 1       |
| Non - vaccine serotype <sup>d</sup>   | 3                    | 4       | 3              | 3       | 0                | 1       |
| Influenza A virus                     | N=40                 | N=68    | N=15           | N=24    | N=24             | N=41    |
| Vaccine serotype                      | 0                    | 1       | 0              | 0       | 0                | 1       |
| Vaccine related serotype              | 1                    | 0       | 1              | 0       | 0                | 0       |
| Respiratory syncytial virus           | N=176                | N=199   | N=34           | N=38    | N=138            | N=154   |
| Vaccine serotype                      | 0                    | 3       | 0              | 2       | 0                | 1       |
| Non - vaccine serotype                | 2                    | 0       | 2              | 0       | 0                | 0       |
| Parainfluenza virus type 1-3          | N=31                 | N=51    | N=13           | N=19    | N=18             | N=31    |
| Vaccine related serotype              | 1                    | 0       | 0              | 0       | 1                | 0       |

<sup>a</sup>N indicates the number of children in whom blood culture was performed. <sup>b</sup>Indicates pneumococcal serotypes that were included in the 9-valent pneumococcal conjugate vaccine. <sup>c</sup>Refers to pneumococcal strains for which cross-reactive serotypes are included in the vaccine. <sup>d</sup>Refers to pneumococcal strains for which serogroup is not included in the vaccine. <sup>e</sup>Includes cases in children whose HIV status was unknown.
